# Supplementary material for: Evaluating the Efficacy of Resect-and-Discard and Resect-and-Retrieve Strategies for Diminutive Colonic Polyps
Source: MDPI journal article supplement (doi:10.3390/life14040532), 2024-04-21
Supplement: s1 [file s1]

## Completed STROBE checklist for cohort studies and analysis plan information

This checklist was elaborated using formal items recommended for cohort studies from STROBE statement (<https://www.strobe-statement.org>).

|                      | Item No | Recommendation                                                                                                                  | Respected ? | Comments and quotes                                                                                                                                                                                                                                                                                                                                                                                                                                                                                                                                                    |
|----------------------|---------|---------------------------------------------------------------------------------------------------------------------------------|-------------|------------------------------------------------------------------------------------------------------------------------------------------------------------------------------------------------------------------------------------------------------------------------------------------------------------------------------------------------------------------------------------------------------------------------------------------------------------------------------------------------------------------------------------------------------------------------|
| Title and abstract   | 1       | (a) Indicate the study's design with a commonly used term in the title or the abstract                                          | Yes         | Study design is indicated in the Methods/Findings section of the abstract<br>"A prospective cohort study was conducted at two endoscopy centres in Romania." Page 1 L18                                                                                                                                                                                                                                                                                                                                                                                                |
|                      |         | (b) Provide in the abstract an informative and balanced summary of what was done and what was found                             | Yes         | These information are stated in the study abstract (study objective described, method and results described)                                                                                                                                                                                                                                                                                                                                                                                                                                                           |
| <b>Introduction</b>  |         |                                                                                                                                 |             |                                                                                                                                                                                                                                                                                                                                                                                                                                                                                                                                                                        |
| Background/rationale | 2       | Explain the scientific background and rationale for the investigation being reported                                            | Yes         | Rationale and existing literature are stated in the introduction section                                                                                                                                                                                                                                                                                                                                                                                                                                                                                               |
| Objectives           | 3       | State specific objectives, including any prespecified hypotheses                                                                | Yes         | A statement at the end of the introduction specifies the specific goals and objectives.<br>"Considering these data and the fact that the main benefit of knowing the histology of diminutive polyps is the correct setting of the follow-up interval after polypectomy, the aim of the present study was to assess the characteristics and variables associated with diminutive polyps in the target population, with the intent of developing a combined resect-and-retrieve or resect-and-discard strategy that obviates the need for op-tical diagnosis" Page 2 L85 |
| <b>Methods</b>       |         |                                                                                                                                 |             |                                                                                                                                                                                                                                                                                                                                                                                                                                                                                                                                                                        |
| Study design         | 4       | Present key elements of study design early in the paper                                                                         | Yes         | Study design is stated in the first subsection of Materials and Methods. Key elements are all described in the methods.<br>"This prospective cohort study was conducted across two endoscopy centers in Romania." Page 2 L94                                                                                                                                                                                                                                                                                                                                           |
| Setting              | 5       | Describe the setting, locations, and relevant dates, including periods of recruitment, exposure, follow-up, and data collection | Yes         | Setting, contexts, dates of inclusion, are fully described in the Materials and Methods section under "2.1 Study Design and                                                                                                                                                                                                                                                                                                                                                                                                                                            |

Selection Criteria” and “2.2 Endoscopic Equipment and Data Collection” headlines page 2 and 3.

|                              |    |                                                                                                                                                                                      |     |                                                                                                                                                                                   |
|------------------------------|----|--------------------------------------------------------------------------------------------------------------------------------------------------------------------------------------|-----|-----------------------------------------------------------------------------------------------------------------------------------------------------------------------------------|
| Participants                 | 6  | (a) Give the eligibility criteria, and the sources and methods of selection of participants                                                                                          | Yes | Study population is described in the Materials and Methods section (2.1 Study Design and Selection Criteria) Page 3 L100                                                          |
|                              |    | (b) For matched studies, give matching criteria and number of exposed and unexposed                                                                                                  | N/A | Non applicable                                                                                                                                                                    |
| Variables                    | 7  | Clearly define all outcomes, exposures, predictors, potential confounders, and effect modifiers. Give diagnostic criteria, if applicable                                             | Yes | These data can be found in Materials and Methos section (2.1 Study Design and Selection Criteria) Page 2 95                                                                       |
| Data sources/<br>measurement | 8* | For each variable of interest, give sources of data and details of methods of assessment (measurement). Describe comparability of assessment methods if there is more than one group | Yes | Data collection and measurement was the same for all variables, and is described in the Materials and Methods section (2.2. Endoscopic Equipment and Data Collection) Page 3 L114 |
| Bias                         | 9  | Describe any efforts to address potential sources of bias                                                                                                                            | Yes | We notably tried to reduce bias by defining clear exclusion criteria Page 3 L104                                                                                                  |
| Study size                   | 10 | Explain how the study size was arrived at                                                                                                                                            | Yes | “The study aimed to include a comprehensive cohort of adult patients undergoing complete colonoscopies, where polyps were identified and resected endoscopically” Page 2 L97      |
| Quantitative variables       | 11 | Explain how quantitative variables were handled in the analyses. If applicable, describe which groupings were chosen and why                                                         | Yes | These are described in the Materials and Methods section under “2.3. Statistical Analysis” P3 L118                                                                                |
| Statistical methods          | 12 | (a) Describe all statistical methods, including those used to control for confounding                                                                                                | Yes | These are described in the Materials and Methods section under “2.3. Statistical Analysis” P3 L118                                                                                |
|                              |    | (b) Describe any methods used to examine subgroups and interactions                                                                                                                  | Yes | These are described in the Materials and Methods section under “2.3. Statistical Analysis” P3 L118                                                                                |
|                              |    | (c) Explain how missing data were addressed                                                                                                                                          | Yes | These are described in the Materials and Methods section under “2.3. Statistical Analysis” P3 L118                                                                                |
|                              |    | (d) If applicable, describe analytical methods taking account of sampling strategy                                                                                                   | N/A | Non applicable                                                                                                                                                                    |
|                              |    | (e) Describe any sensitivity analyses                                                                                                                                                | N/A | Non applicable                                                                                                                                                                    |

## Results

|                  |     |                                                                                                                                                                                                              |     |                                                                                                                                           |
|------------------|-----|--------------------------------------------------------------------------------------------------------------------------------------------------------------------------------------------------------------|-----|-------------------------------------------------------------------------------------------------------------------------------------------|
| Participants     | 13* | (a) Report numbers of individuals at each stage of study—eg numbers potentially eligible, examined for eligibility, confirmed eligible, included in the study, completing follow-up, and analysed            | Yes | This is described at the beginning of result section “The total participant count was 427.” Page 3 L132                                   |
|                  |     | (b) Give reasons for non-participation at each stage                                                                                                                                                         | N/A | Not applicable                                                                                                                            |
|                  |     | (c) Consider use of a flow diagram                                                                                                                                                                           | N/A | Use of a flow diagram was not deemed appropriate                                                                                          |
| Descriptive data | 14* | (a) Give characteristics of study participants (eg demographic, clinical, social) and information on exposures and potential confounders                                                                     | Yes | Table 1 describes the characteristics of the participants “Table 1. Demographic and clinical characteristics of patients.” page 3 L145    |
|                  |     | (b) Indicate number of participants with missing data for each variable of interest                                                                                                                          | N/A | Not applicable                                                                                                                            |
| Outcome data     | 15* | Report numbers of outcome events or summary measures                                                                                                                                                         | Yes | All numbers are reported in Tables                                                                                                        |
| Main results     | 16  | (a) Give unadjusted estimates and, if applicable, confounder-adjusted estimates and their precision (eg, 95% confidence interval). Make clear which confounders were adjusted for and why they were included | Yes | “Table 3. Logistic regression analysis of factors impacting the probability of adenomatous polyps with high-grade dysplasia.” Page 5 L207 |
|                  |     | (b) Report category boundaries when continuous variables were categorized                                                                                                                                    | Yes | Category boundaries are displayed in variable headings in the tables, where applicable                                                    |
|                  |     | (c) If relevant, consider translating estimates of relative risk into absolute risk for a meaningful time period                                                                                             | N/A | N/A                                                                                                                                       |
| Other analyses   | 17  | Report other analyses done—eg analyses of subgroups and interactions, and sensitivity analyses                                                                                                               | Yes | “Table 3. Logistic regression analysis of factors impacting the probability of adenomatous polyps with high-grade dysplasia.” Page 5 L207 |

## Discussion

|             |    |                                                                                                                                                            |     |                                                                                              |
|-------------|----|------------------------------------------------------------------------------------------------------------------------------------------------------------|-----|----------------------------------------------------------------------------------------------|
| Key results | 18 | Summarise key results with reference to study objectives                                                                                                   | Yes | Key results are described in the Discussions section, Page 8-9 L279-306, and in Conclusions. |
| Limitations | 19 | Discuss limitations of the study, taking into account sources of potential bias or imprecision. Discuss both direction and magnitude of any potential bias | Yes | Description of limitations is done under Discussions section Page 8 L308                     |

|                          |    |                                                                                                                                                                            |     |                                                                                                                                                                                                                                                                                                                                           |
|--------------------------|----|----------------------------------------------------------------------------------------------------------------------------------------------------------------------------|-----|-------------------------------------------------------------------------------------------------------------------------------------------------------------------------------------------------------------------------------------------------------------------------------------------------------------------------------------------|
| Interpretation           | 20 | Give a cautious overall interpretation of results considering objectives, limitations, multiplicity of analyses, results from similar studies, and other relevant evidence | Yes | In the Discussions section references were added and discussed, and, limitations were taken into account.                                                                                                                                                                                                                                 |
| Generalisability         | 21 | Discuss the generalisability (external validity) of the study results                                                                                                      | Yes | “This strategy exceeded the $\geq 90\%$ benchmark agreement proposed, showcasing its potential effectiveness in clinical practice. While our findings are promising and provide a solid foundation for the efficacy of this approach, it is imperative to conduct further studies to validate and expand upon these results.” Page 9 L321 |
| <b>Other information</b> |    |                                                                                                                                                                            |     |                                                                                                                                                                                                                                                                                                                                           |
| Funding                  | 22 | Give the source of funding and the role of the funders for the present study and, if applicable, for the original study on which the present article is based              | Yes | Funding information are displayed at the end of the Manuscript, Page 10 L334                                                                                                                                                                                                                                                              |
